# Supplementary material
Source: Research Square preprint supplement (doi:10.21203/rs.3.rs-9516701/v1)
Supplement: Supplementary file 1 [file e94d741c7e0a29b42a3aa7d0.docx]

**Interview guide for caregivers**

**General Context**

1. How is your child’s health today ?

**Health challenges**

2 . What aspect of taking care of your child’s health at home has sometimes

been difficult for you?

a. Probe: (giving medications, managing symptoms of illness, coming for hospital visit , personal hygiene etc )

3. You told me [NAME OF CHALLENGE] was sometimes difficult for

you at home.

a. What was challenging about ____________?

b. How does [CHALLENGE] affect you?

c. Were there times when you were not sure about what to do or

how to make it better?

4. You also mentioned [CHALLENGE #2] was sometimes difficult for

you at home.

a. (Continue as with probes above for additional challenges)

**Family caregiver and health challenges**

5. Do you have a family member or friend who helps you manage Your child’s health at home?

6. How does he/she help you manage your child’s health care needs?

i. Can you please explain your answer to me?

7. Were there any times when you were not sure about what to do, for example, how to take care of a health problem or challenge?

a. Probe: Needed more information about a problem from a medical expert?

**Social Determinants of Health**

8. In the past few months, have you experienced any problems with getting access to community resources (such as community health services , transportation,electricity etc )

a. Probe: If yes, will you please explain so I understand?

b. Probe: How do the health care nurse can help you to with this problem?

9. How did the health staff prepare you to take care of your medical needs after hospital discharge ?

a. Probe: (taking your medications, managing your symptoms ,personal hygiene etc )

b. Were they helpful to you?

10. Did the nurse give you a written plan to help you remember ways to take care of your health care needs?

a. If [YES], how helpful was the plan?

b. If [NO], did the nurse give you written instructions to help with any medical health care needs?

11. What do you wish the nurse had taught you more about? It can be any topic you can imagine

a. Probe: how would this additional information help?

i. Did you mention this information to your nurse?

b. For us, this is an important question. Can you think of any other services that might have been helpful to you and your family?

Probe: Did you/Do you have everything you needed to take care of your health?

**Discharge Preparedness and concerns**

12. Overall, how confident do you feel about taking care of your child’s health care needs? (taking your medications, managing your symptoms ,personal hygiene)

a. Not confident

b. Somewhat confident

c. Very confident

i. Probe: Please tell me more about your answer

13. After getting discharge from hospital , did you have any unexpected health events or problems?

a. Probe: medication issues, falls?

b. How did you handle it? What was the outcome?

14. Have you had to go to the Emergency Department? Urgent care? hospitalized? Made an unplanned visit to your healthcare provider’s office?

a. Probe: What happened?

b. Probe: How long were you in the hospital??

c. Probe: Why did you decide to go to the ED/hospital?

**Closing**

28. You’ve done a great job with this interview. Before we wrap-up our time together, would you like to tell anything we could do better to help you care for yourself at home?

Thank you.

**Interview guide for Home Health Care Clinicians/Nurses**

**Establishing Context**

1. What is your professional role in this hospital ?

a. How long have you been in this institute in this role?

2. I understand that you also discharged many patients from hospital . Is that correct?

Now, I will ask you questions about your experiences with[PATIENT] and their discharge.

**Healthcare challenges**

One of our main goals is to understand the challenges experienced by caregivers of children after discharge from hospital . Thinking back to your discharge experience with [PATIENT]:

3. What concerns did you have about [caregiver ]’s ability to care for child after discharge from hospital?

4. In your opinion, how could (CONCERN #1) have an impact on [PATIENT’s] health or safety?

5. In your opinion, how could (CONCERN #2) have an impact on [PATIENT’s] health or safety

6. what would be necessary to decrease the chance of poor outcomes for [PATIENT]?

**Family Caregivers and health challenges**

7. What concerned you about the ability of the caregiver to support the patient at home?

**Social Determinants of Health**

Now I would like you tell me about some of the social factors that may influence [PATIENT]’s health.

8. Did [PATIENT] have any challenges accessing community resources (community health services, transportation)

a. Probe: If yes, what were your recommendations to address this challenge?

9. What recommendations do have to help to assess and support the patient’s social needs at discharge?

**Discharge preparedness**

9. How did you prepare the [PATIENT FAMILY ] to continue healthcare independently after discharge from home health? (Taking medications, managing symptoms (blood sugar, weights, fatigue, pain),doctor’s appointment, being safe around the house, “getting around,” personal hygiene)

a. How did you teach the [Family ] skills or provide information to help [PATIENT] continue healthcare independently after discharge?

i Probe: (taking medications, managing symptoms (blood sugar,weights, fatigue, pain), doctor’s appointment, being safe around the house, “getting around,” personal hygiene)

b. What additional topics did you teach the [PATIENT] or their caregiver to prepare them for care after discharge?

10. Did you provide written information about [PATIENT]’s treatment plan

c. Was it helpful? (If not, why?)

11. If you had the opportunity to teach [PATIENT] other lessons or skills, what additional topics do you think would be important to cover?

d. What prevented you from teaching those other lessons or

12. Do you believe that [Family ] recognized or accepted the importance of the services that you were providing to prepare for independent care at home?

f. Probe: Will you explain your answer to me?

13. Can you give an example of how you incorporated [PATIENT Family]’preference into the plan of care? Discharge plan?

**Discharge preparedness and concerns**

14. Did you believe that caregiver had a good understanding of how to take care of their health after discharge?

g. Disagree

h. Somewhat agree

i. Agree

i. If [agree] how do you determine that the [PATIENT] and caregiver was adequately prepared.

ii. If [disagree], can you share with me why you believe that [PATIENT] and caregiver was not adequately prepared.

j. Probe: Do you believe patient’s caregivers had all the tools and supplies needed to take care of their health?

15. Overall, how confident did you believe [PATIENT family ] was, to takecare of their health care needs? Probe: (taking medications, managing symptoms (blood sugar, weights, fatigue, pain), getting to doctor’s, being safe around the house, “getting around,” personal

hygiene).

k. Not confident

l. Somewhat confident

m. Very confident

i Probe: would you explain your answer to me

16. What do you believe were [Caregivers ] strengths and weakness at the time of discharge?

17. In your professional opinion, what do you believe, can help the patient be more prepared?

**Unexpected events and service outcomes**

18. Did you have any concerns about patient unexpected health events or problems after discharge?

a. Probe: re-hospitalization, ED visits, medication issues, falls?

b. Can you tell me more about your answer?

19. Did you have any concerns about patient going to the EmergencyDepartment? Urgent care? hospitalized? Made an unplanned visit to their healthcare provider’s office?

a. Probe: If yes, what were your recommendations to address this

challenge?

**Closing**

20. I appreciate your important insights. As we conclude the interview today, I would like to ask one more question. What type of support for you would help you in your work to prepare patients and caregivers for self-care after home health ends?

**Knowledge questionnaire for caregiver’s on transition care for children**

**The researcher will ask these questions to respondents and write the answer as given by the respondents.**

**Baseline Data:**

1.Name:

2. Relationship with the child:

3.Age:

4.Gender:

5.Child’s Diagnosis:

6.DOA:

7.Previous experience of caring:

8.Previous Hospitalization History :

9.Education Status:

**The following questionnaire consists of questions related to caregiver’s knowledge on transition care for children. The researcher will ask these questions and write down the single correct answer as per the respondents.**

**Knowledge Questions:**

1.**Baby Amit is feeling dizzy ,his face is looking pale , he is not able to breathe properly , struggling with the normal breathing ,what problem the child is facing?**

a.Breathing difficulty

b.Vertigo

c.Fatigue

d.Pain

**2.What is the immediate position you can give to relief the child from breathing difficulties?**

a.An upright sitting position with back supported with some pillow

b.A lying down position

c .Lie down in a belly supported position

d.In a standing position

**3.Child is discharged from hospital , during home transition from hospital you can see child getting irritated and skin colour is becoming blues, what immediate action to be taken ?**

a.Place the knee of the baby flexed towards chest (knee-chest position )

b.Place the child in lying down position

c.This colour will go away automatically

d.Leave the child like that

**4.Child Raju is having cough from last 2 days , you can hear a sound of secretion while he is coughing but no secretion is coming out , what you will do to remove the secretion and make Raju feel better ?**

a.Some medication

b.Steam inhalation

c.Bring Raju to a hospital

d.No intervention is needed

**5.In which position you can give katori spoon feeding to your child?**

a.Lying down position

b.Child in an upright position

c.Side lying position

d.Any position

**6.What is the important instruction to be followed during formula feeding**

a.Measure the formula correctly

b.Give feeding in lying down position

c.Mix with medicine

d.Mix formula with breastmilk

**7.During tube feeding to your child what kind of food you can give through the tube ?**

a.Solid food

b.Semi solid food

c.Liquid food

d.Spicy food

**8. In case your child' s tube is coming out from the nose of the child the immediate action is**

a. Go to some nearby hospital and change the tube by a health care professional

b. Try to change the tube at home

c. Try to reposition the tube

d. Leave the tube like that

**9.Till what age you can breastfeed exclusively to your child?**

a.6 month

b.2years

c.5years

d.10years

**10.You are breastfeeding your baby, you are feeling continuous pain while baby sucks and also breast seems enlarged and hard while pumping .What action you can take to relief this symptoms?**

a.Stop feeding

b.Shift to formula feed

c.Apply hot water bag and massage breast before feeding

d,Apply ointments on breasts

**11.Your child is on High protein diet , how you will prepare a high protein diet for your child?**

a.Milk products +Fish and egg+Green vegetables

b.Rice+Roti+Chicken

c.Fruits+Milk+Rice

d.Packed food

**12.Child Sumit is now discharged from hospital , suddenly he is feeling severe abdominal pain, has passed stool 4 times from morning , he is feeling very week, What is the problem of this child?**

a.Fever

b.Breathing problem

c.Diarrhea

d.Vomiting

**13. How you can manage the symptoms of child Sumit(in reference to question 11)**

a. giving normal water

b.give him more food

c.give ORS solution

d. give him fruit juice

**14. You want to give the child ORS but at the moment you are not having ORS packet in your home , how you can prepare the ORS with your kitchen ingredients ?**

a.mix water+sugar+lemon

b.mix 1 litre water+6 teaspoons of sugar+half teaspoon of salt

c.mix 2 litre water +sugar+lemon juice

d.Mix water+lemon juice+salt

**15.Child Suvi is passing lose stools from morning , what kind of food will help her to manage the symptoms ?**

a.Curd

b.Rice

c.Juice

d.Milk

**16.Child Rakesh is admitted to hospital ,not able to pass urine from last one day ,what action is needed to make the child stable ?**

a.Wait for some more day

b.Put a urinary catheter to the child

c.Give some medication

d.No need to take any action

**17.Your child is discharged with a urinary catheter for urine passing , what you can do to prevent any infection to the child ?**

a. Clean the area around the catheter

b.Touch the catheter is bare hands

c.Give medications

d.Remove the catheter

**18. Your child is having urinary catheter, suddenly he is complaining about abdomen pain, you can see there is no urine in the bag, it indicates that**

a. May be there is some problem in the catheter

b. The child is having some gastric symptoms like abdominal pain

c. Child’s catheter is absolutely fine

d. You can try removing the catheter

**19.Your child got discharged from hospital , now his catheter is removed but he is not able to pass urine from last 6 hours. What action you need to take ?**

a.Wait for some more time

b.Again catheterize the child

c. Give a hot-cold water massage over lower belly

d.No need to take any action

**20.Child B is now at home, he is stable and doing well, 2 days post discharge he has developed a 100 degree fever , no other symptoms are there, what is the problem now with this child?**

a. Infection

b.No issue

c.Pain

d.Child is having some effect due to medicine

**21.What are the steps you can follow to prevent any infection to your child at home ?**

a.Maintain cleanliness of child’s cloths

b.Keep the child in a crowded area

c.Give him a spicy food

d.No need to maintain personal hygiene of the child

**22.Child Rita is now easily getting tired during play, she is looking very pale and lethargic , she is feeling dizziness during playing, what may be the problem ?**

a. sick due to improper food pattern

b. tired due to playing

c. tired due to his illness

d. Child is making excuses

**23 .You should maintain the oral hygiene of your child by**

a. Daily brushing the teeth of the child

b. If active brushing is not possible then mouth rinsing with mouthwash if child can sit.

c. If child can’t swallow or spit then mouth rinsing to be avoided

d. All of the above

**24.Your child is having a wound on left leg , it needs dressing on daily basis, now child got discharge how you will do dressing at home ?**

a.Cleaning with plain water and put ointment

b.Cleaning with ointments

c. No need to clean the wound

d.You can skip the dressing

**25.What is the most important precaution you need to take during wound dressing?**

a.Touch the area with bare hand

b.Do not do dressing in bare hands

c.Do dressing in a crowded room

d.You cannot do dressing in home

**26.Child Raja is sleeping in his bed , suddenly you see his hands are stiffen and eye is rolling upward, what do you think the problem is ?**

a.Fever

b.Convulsion

c.pain

d.Infection

**27. Which of the following position you should give during seizure?**

a. Keeping the baby in a lying down position

b. Keeping the baby in side lateral position

c. Try to make the baby sit

d. Try to keep the baby in a standing position

**28. Which of the following thing to be followed during the child is having seizure?**

a. Continue feeding the child

b. Avoid anything giving by mouth

c. Give water to drink

d. Hold the child’s hand

**29.A child is discharged from hospital 2 days back , you can now see that he is not stable and** some abnormal symptoms are present, what is this sign known as ?

a.Emergency signs which need immediate medical attention

b.Normal symptoms

c.No need of medical attention

d.Wait for some more symptoms

**30.Doctor has advised Tab Paracetamol 250 mg two times a day after food for child Mita ,A tablet of Parectamol is of 500 mg, How you will give this medicine to the child ?**

a.Give a tablet of paracetamol two times

b.Give half tablet two times

c.Skip this medicine

d.Give as many tablet as you want

**31.Your child is advised to take Syrup A 15 ml before food, how you will measure this syrup?**

a.A tablespoon

b.A teaspoon

c.Two tablespoons

d.Two teaspoons

**32.Child Mita is very weak and she is reluctant to sit while you are giving a oral syrup, She is taking the medicine while lying down flat, suddenly she started coughing badly, what has happed to this child ?**

a.Child is having cough and cold

b.Child got chocked so she is coughing

c.No problem to this child

d.Child has swallowed the syrup

**33. you forget to give medicine in scheduled time what next step you can take**

a. Give a double dose in the next dose if advised

b. Skip the medicine like that

c. You can give any other time the missed dose

d. You can give medicine in the next dose as per your wish

**34.You want to check the temperature of your child, which instruction you need to follow?**

a.Check temperature while the child is wearing extra clothing

b.Place the thermometer in the axilla of the child make sure it tucked properly against child’s body

c.Remove the thermometer before it make a beep sound

d.For digital thermometer shake the thermometer before use

**35.How you can count your child’s respiratory rate at home ?**

a.Place an hand over chest and count the number of time chest rises

b.Observe the number of time abdomen rises

c.Count the number of time you child’s inhalation sound

d.You need a machine for counting respiratory rate

**36.When you should come for child’s vaccination ?**

a.Any day you are free from work

b.As per the scheduled date

c.When you are coming for routine check up

d.During emergency

**37.When you should go for hospital check ups?**

a.In emergency situation

b.Child is doing well

c.Any time

d.Should not go

**38. What do you think is the most common cause responsible for error related to medicine administration at home?**

a. Not remembering the correct dose and lack of available written instructions

b. Too many medicine to give

c. Child is reluctant to take medicine

d. Caregivers are not use to with the medicines doses

**39. Baby Gola is discharged now from hospital; nurse has asked to come back to hospital for routine check-up after 15 days, What you should do ?**

a. Skip the routine check up

b. Follow the schedule for routine check up

c.Mnage the baby at home

d.Do the routine check up later

**40.Your child got discharged after a 15 days of hospitalization , your home is very far from the hospital,your child developed 102 degree fever from last 2 days , with medicine fever is not getting reduced ,What you will do to manage the symptom?**

a.Wait for next routine check up date

b.Go to a nearby hospital

c.Call the emergency Department

d.Give home medicine

**Caregiver Satisfaction Questionnaire**

**Name of Patient:**

**ID No:**

**Length of hospital stay:**

**Diagnosis:**

**The following questions are made to know your satisfaction level on discharge care instructions given and administration of Transition care model components.**

**Please tick on the face as per your opinion on the following questions.**

**
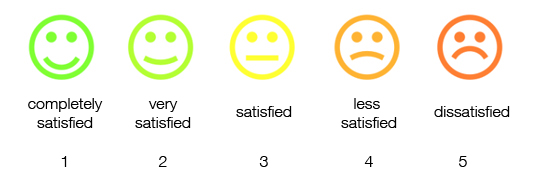
**

**5 4 3 2 1**

Signature of Caregiver:

Date:

| **Questions** | **Rating** |
| --- | --- |
|  | 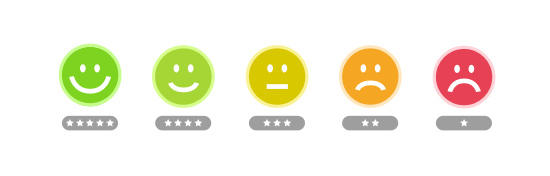  5 4 3 2 1 |
| 1. Are you satisfied with the treatment your child is receiving in ward? |  |
| 1. Are you sure your child is ready for discharge from ward? |  |
| 1. During hospital stay was there any healthcare provider to whom you could talk concerning your questions? |  |
| 1. I am informed about child’s illness and further therapy? |  |
| 1. I know the intended purpose of all medications of my child. |  |
| 1. I understand well about post discharge care strategy |  |
| 1. Plan of post discharge care is well discussed with me |  |
| 1. Explanation of each medicine purpose and dose is given |  |
| 1. I am explained about in emergency whom to contact for help |  |
| 1. Rate your overall satisfaction with hospital stay |  |

***Post Transition Follow-up Phone Call Documentation Form***

Patient name: Caregiver(s) name(s): Relationship to patient: Notes: Discharge date: Principal discharge diagnosis:

***Prior to phone call:***

Review:

Health history:

Medicine lists :

Contact sheet :

Discharge summary :

**Call Completed:** Yes No

With whom (patient, caregiver, both):

Number of hours between discharge and phone call:

**Consultations (if any) made prior to phone call:**

- None
- Called Consultant
- Called Emergency
- Other:

**If any consultations, note to whom you spoke, regarding what, and with what outcome:**

**Specific follow up reviewed with patient**

| **Follow up** | **1st month** | **2nd month** | **3rd month** |
| --- | --- | --- | --- |
| **1.Any Fresh complain** |  |  |  |
| **2.Current health status** |  |  |  |
| **3.What are the current care needs of your child?** |  |  |  |
| **4.Are you able to perform all care procedures of your child confidently?** |  |  |  |
| **5.What are the problems you face while taking care of your child?** |  |  |  |
| **3.Any improvement in condition of child** |  |  |  |
| **4.Further medical help needed** |  |  |  |
| **5.Medications ongoing** |  |  |  |
| **6.Vitals stable/unstable** |  |  |  |
| **7.Immediate transfer to hospital needed** |  |  |  |
| **8.Do you need any further information on child’s care aspect ?** |  |  |  |
| **9.Have any time after hospital discharge your child got readmitted to hospital ?** |  |  |  |
| **9.Appointment Schedules next on :** | | | |
| **10.Additional comments:** | | | |

**If primary condition has worsened:**

What, if any, actions had the patient taken?

 Returned to see his/her clinician (name):

 Called/contacted his/her clinician (name):

 Gone to the ER/urgent care (specify):

 Gone to another hospital/MD (name):

 Spoken with visiting nurse (name):

 Other:

 What, if any, recommendations, teaching, or interventions did you provide?

**If new problem since discharge:**

Had the patient:

 Contacted or seen clinician? (name):

 Gone to the ER/urgent care? (specify):

 Gone to another hospital/MD? (name):

 Spoken with visiting nurse? (name):

Other?:

**Additional notes:………………………………………………………………………..**

**Time for speaking with family or caregivers:……………………………………..**

**Total time spent:……………………………………………………………………….**

**Caller’s Signature: …………………………………………………………………..**

**Caregiver’s transition care self-efficacy of caregivers data**

For this part, we are interested in how confident you are that you can perform your child’s care activities. Please think about the questions I am going to read to you carefully, and be as frank and honest as you can about what you really think you can do. Rate your degree of confidence from 0 to 100 where a 0% confidence means that you cannot do it at all, a 50% confidence means that if you gave it your best effort, chances are about 50-50 that you could perform the activity, and a 100% confidence means you are certain you can do it. You can use any score between 0 and 100 to express your confidence.

0 10 20 30 40 50 60 70 80 90 100

Can’t do at all

Certain can do

Moderately can do

| **SI No** | **Questions** | **Answer** | **Degree of Confidence** |
| --- | --- | --- | --- |
| 1 | I know about the symptoms of Congenital heart disease and able to identify in my child | Yes No  | 0 10 20 30 40 50 60 70 80 90 100 |
| 2 | I am able to check my child’s temperature if he has fever | Yes No  | 0 10 20 30 40 50 60 70 80 90 100 |
| 3 | I can count the respiration rate of my child and identify if he has fast breathing | Yes No  | 0 10 20 30 40 50 60 70 80 90 100 |
| 4 | I am able to give nebulization to my child | Yes No  | 0 10 20 30 40 50 60 70 80 90 100 |
| 5 | I am able to calculate medication doses and give in scheduled time | Yes No  | 0 10 20 30 40 50 60 70 80 90 100 |
| 6 | I am able to position my child properly during breastfeeding | Yes No  | 0 10 20 30 40 50 60 70 80 90 100 |
| 7 | I am able to identify if my child is able to do activities as per his age hygiene | Yes No  | 0 10 20 30 40 50 60 70 80 90 100 |
| 8 | I am able to prepare ORS solution correctly and give to my child if he has diarrhea | Yes No  | 0 10 20 30 40 50 60 70 80 90 100 |
| 9 | I am able to maintain personal hygiene of my child | Yes No  | 0 10 20 30 40 50 60 70 80 90 100 |
| 10 | I am able to maintain healthy diet for my child | Yes No  | 0 10 20 30 40 50 60 70 80 90 100 |
| 11 | I know about my child’s next vaccination schedule | Yes No  | 0 10 20 30 40 50 60 70 80 90 100 |
| 12 | I know about my child’s next hospital appointment schedule | Yes No  | 0 10 20 30 40 50 60 70 80 90 100 |
| 13 | I am able to prepare and give Ng tube feeding to my child | Yes No  | 0 10 20 30 40 50 60 70 80 90 100 |
| 14 | I am able to maintain intake output  chart of my child | Yes  No  | 0 10 20 30 40 50 60 70 80 90 100 |
